# Supplementary material for: Effect of operational parameters, characterization and antibacterial studies of green synthesis of silver nanoparticles using Tithonia diversifolia
Source: PeerJ. 2018 Oct 30;6:e5865. doi: 10.7717/peerj.5865 (PMC6214226; doi:10.7717/peerj.5865)
Supplement: Supplemental Information 3 [file peerj-06-5865-s003.xlsx]

## Sheet: Sheet1
			Table 1: Phytochemical screening test result on T. diversifolia
		S/N	Phytochemical screening test	Tithonia diversifolia leaf extract
		1	Test for phenol (FeCl3 test)	-
		2	Test for Saponins (Froth’s test)	+
		3	Test for triterpenes	+
		4	Test for Flavonoids
			(a) Alkali’s test	+
			(b) Lead acetate test	+
		5	Test for Alkaloids	-
			(a) Mayer’s test
		6	Test for steroids (Salkowski’s test)	+
		7	Test for sterols (Libermann-Buchard)	-
			Table key:
			+ = Present,
			- = Absent
